# Supplementary material for: Drivers of ecosystem water use efficiency in a temperate rainforest and a peatland in southern South America
Source: Copernicus journal article supplement (doi:10.5194/egusphere-2023-1932), 2023-10-05

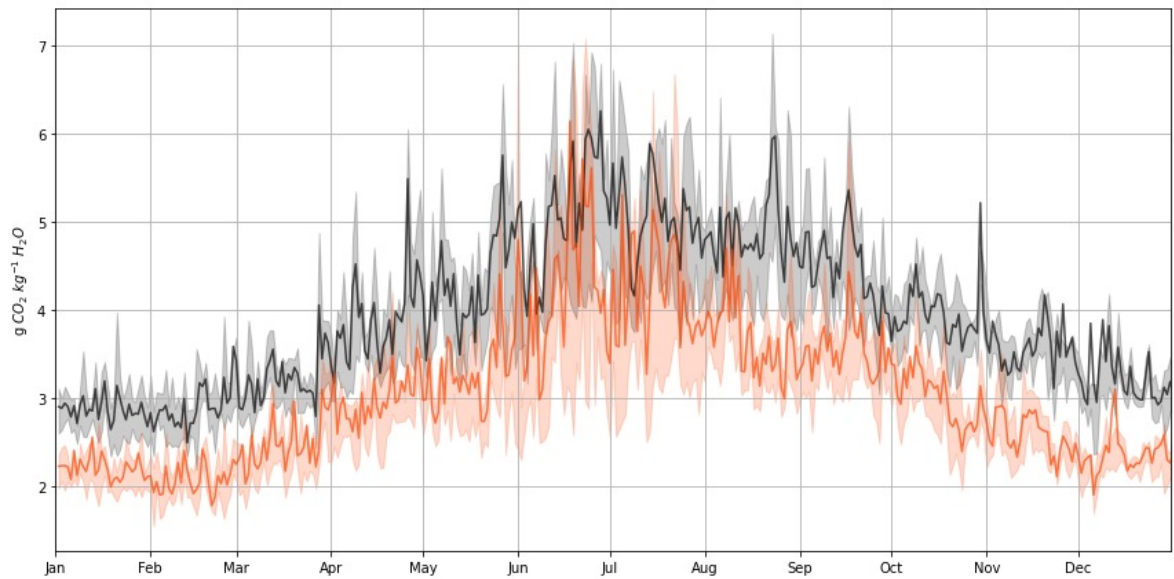

Supplement: Supplementary file [file egusphere-2023-1932-AC2-supplement.pdf]
